# Supplementary material for: Salmonella Breaks Tumor Immune Tolerance by Downregulating Tumor Programmed Death-Ligand 1 Expression
Source: Cancers (Basel). 2019 Dec 24;12(1):57. doi: 10.3390/cancers12010057 (PMC7017279; doi:10.3390/cancers12010057)
Supplement: Supplementary file 1 [file cancers-12-00057-s001.pdf]

## Supplementary Materials

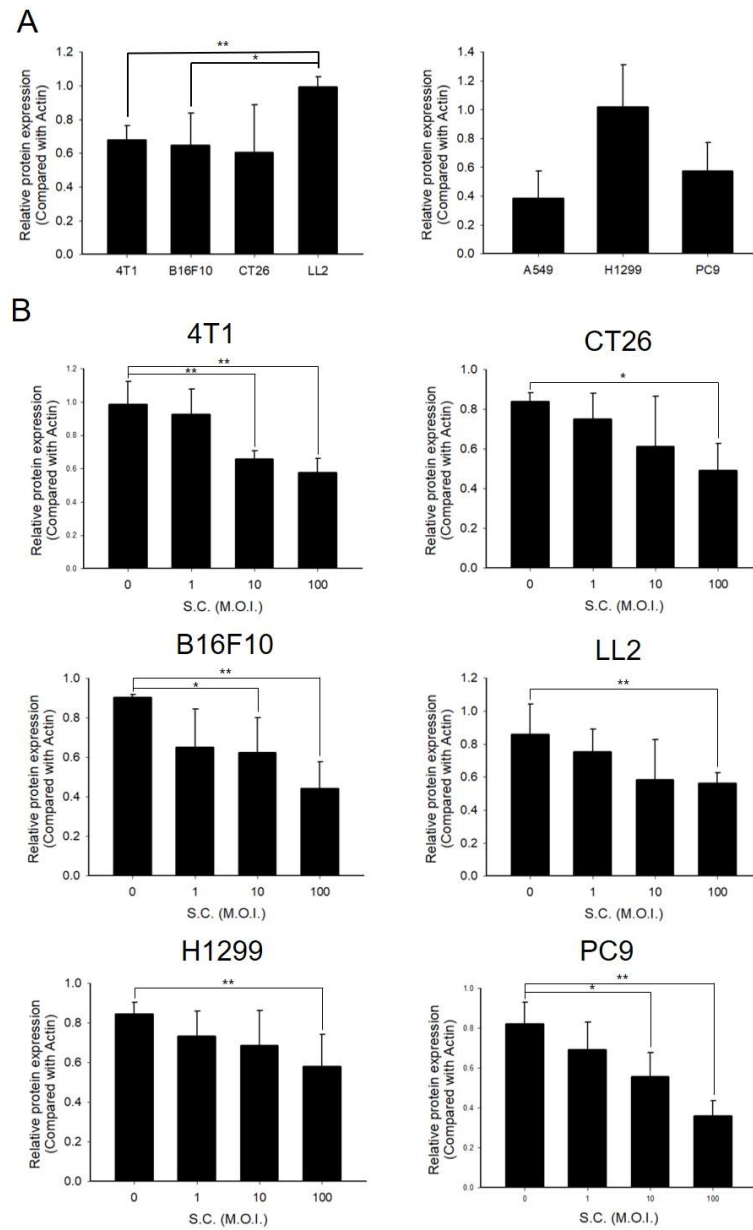

**Figure S1.** (A) Quantified band intensities of respective PD-L1 proteins in various cancer cell lines. (B) Quantified PD-L1 proteins in *Salmonella*-infected cell lines. Statistical significance was calculated using Student t-test. \*,  $p < 0.05$ ; \*\*,  $p < 0.01$ .

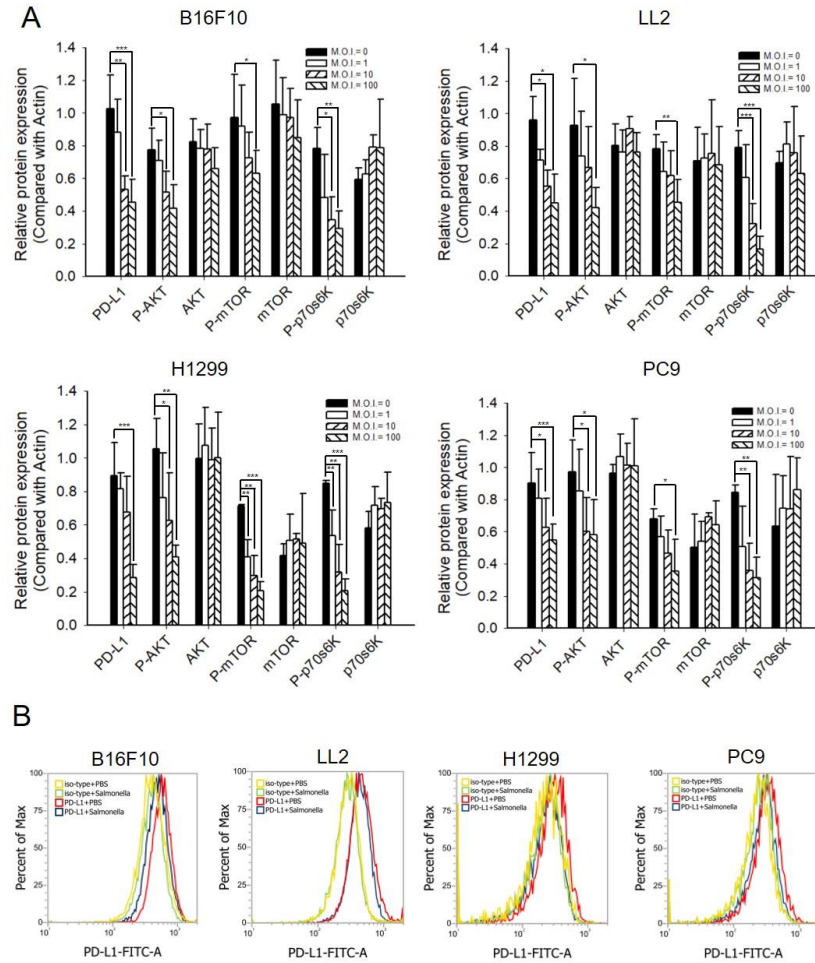

**Figure S2.** (A) Quantified band intensities of respective proteins in *Salmonella*-infected cell lines. (B) PD-L1 expression of *Salmonella*-infected cell lines as assessed by flow cytometry analysis. Statistical significance was calculated using Student t-test. \*,  $p < 0.05$ ; \*\*,  $p < 0.01$ ; \*\*\*,  $p < 0.001$ .

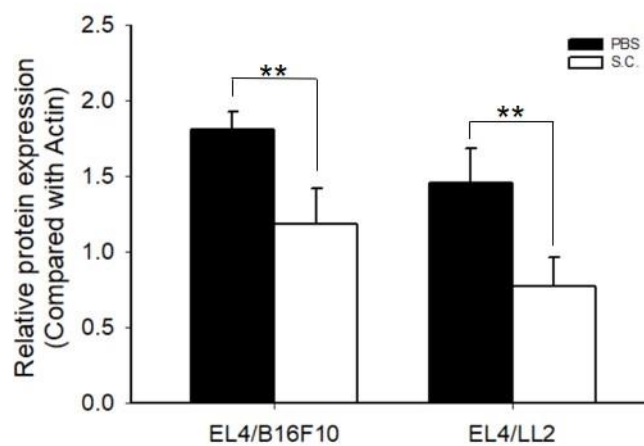

**Figure S3.** (A) Quantified band intensities of cleavage caspase 3 (17/19 kDa) proteins in EL4 co-cultured with cells, compared with each PBS. The inserted values indicate protein expression compared to  $\beta$ -actin. Mean  $\pm$  SD represented independent expression. Statistical significance was calculated using Student t-test. \*\*,  $p < 0.01$ .

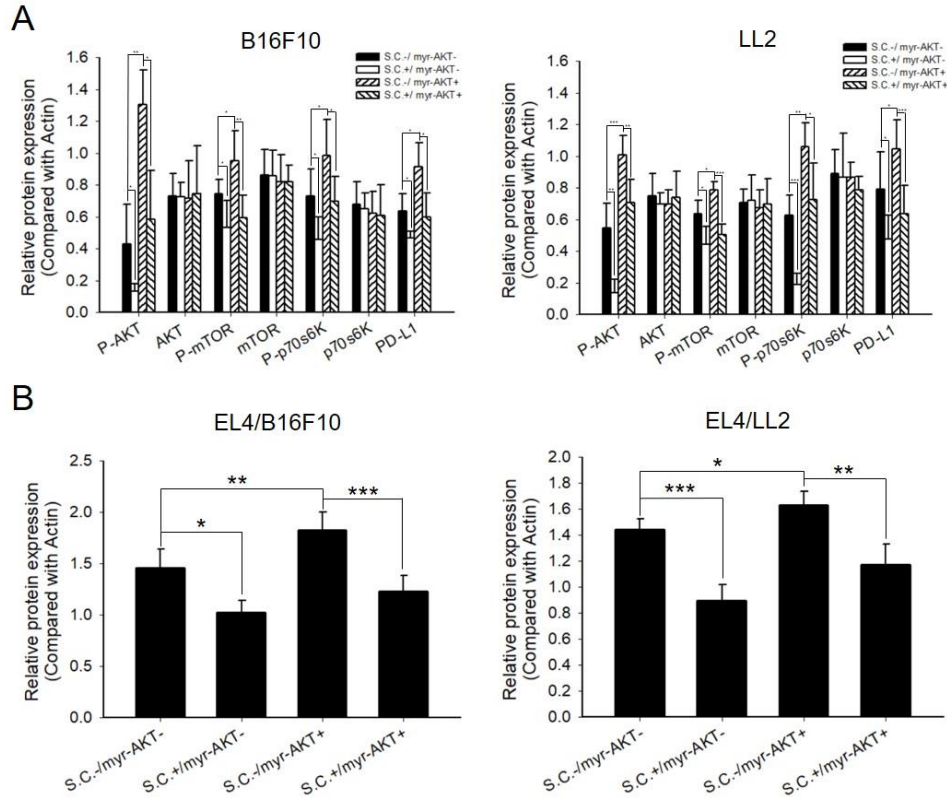

**Figure S4.** (A) Quantified band intensities of respective proteins of tumor cells bearing constitutively active-AKT. (B) Quantified band intensities of caspase 3 (17/19 kDa) protein of EL4 cocultured with tumor having constitutively active-AKT. The inserted values indicate protein expression compared to  $\beta$ -actin. Mean  $\pm$  SD represented independent expression. Statistical significance was calculated using Student t-test. \*,  $p < 0.05$ ; \*\*,  $p < 0.01$ ; \*\*\*,  $p < 0.001$ .

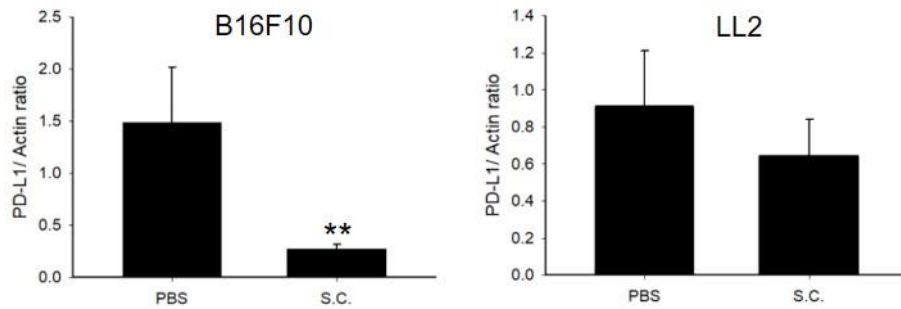

**Figure S5.** Quantified band intensities of tumor-bearing mice PD-L1 protein. The inserted values indicate protein expression compared to  $\beta$ -actin. Mean  $\pm$  SD represented three to four times independent expression. Statistical significance was calculated using Student t-test. \*\*,  $p < 0.01$ , compared with PBS.

**A**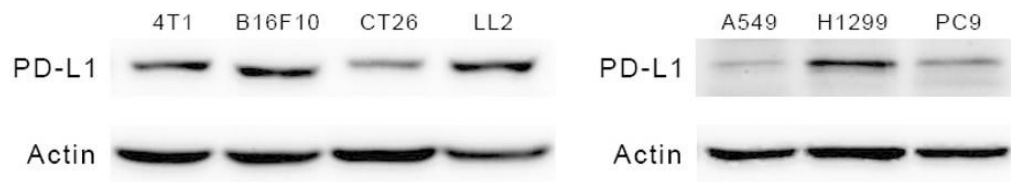**B**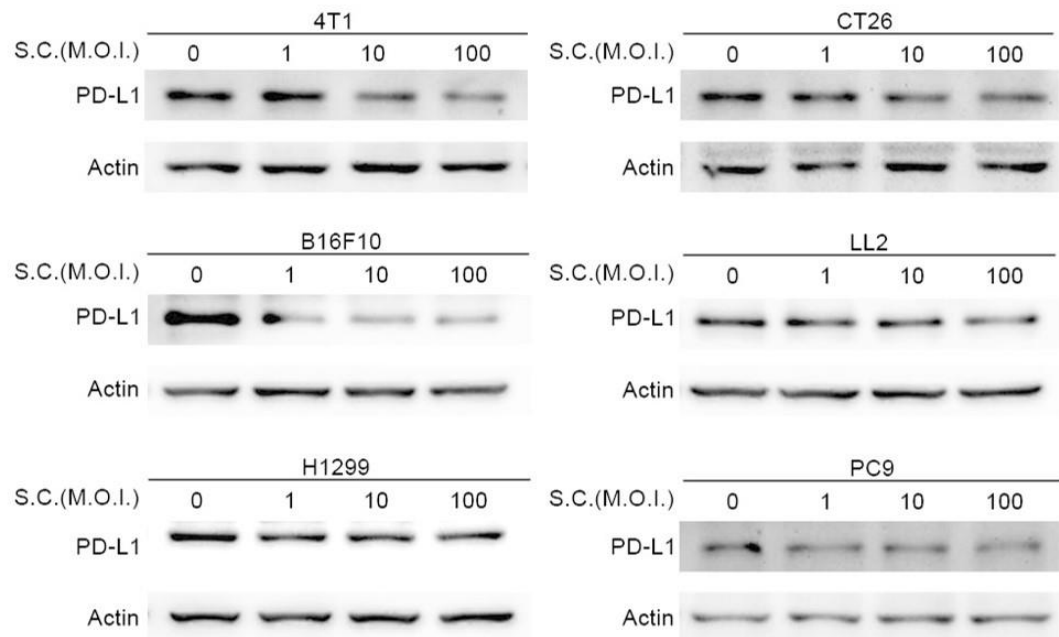

**Figure S6. (A)** Western blotting of cell lysates harvested from different cancer cell lines under normal culture condition revealed varying levels of PD-L1. **(B)** Western blotting of *Salmonella* dose-dependently inhibited PD-L1 expression.

A

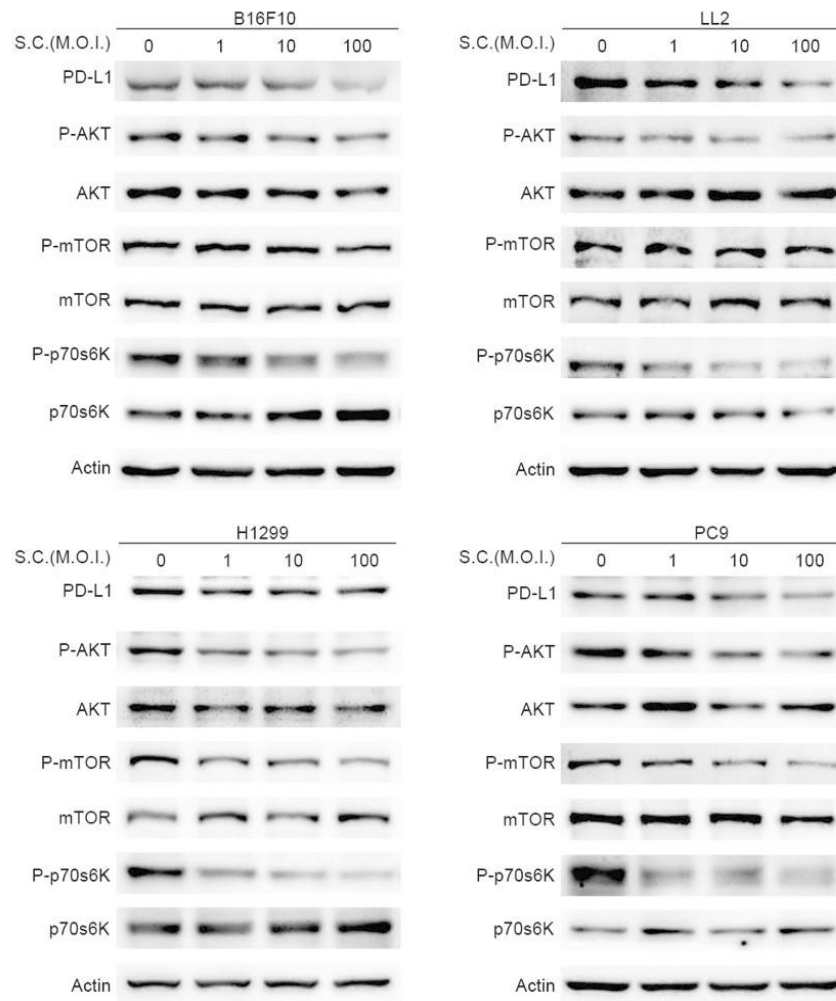

**Figure S7.** Western blotting of respective proteins in *Salmonella*-infected cell lines.

A

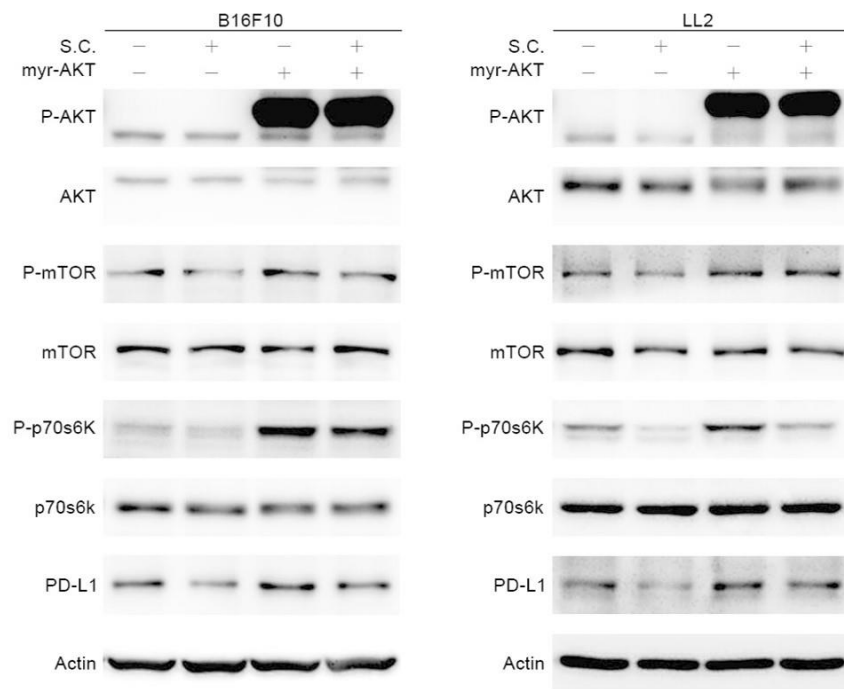

B

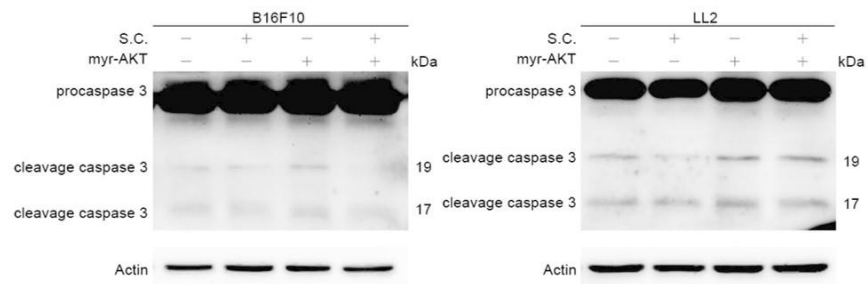

**Figure S8.** (A) Western blotting of respective proteins of tumor cells bearing constitutively active-AKT. (B) Western blotting of caspase 3 protein of EL4 co-cultured with tumor having constitutively active-AKT.
